# Supplementary material for: Treat-to-target urate-lowering therapy and hospitalizations for gout: results from a nationwide cohort study in England
Source: PubMed Central journal article supplement (PMC10321109; doi:10.1093/rheumatology/keac638), 2022-11-10
Supplement: keac638_supplementary_data.pdf [file keac638_supplementary_data.pdf]

**Supplementary Table S1. Summary of prediction models used in the study.**

| Study population                   | Exposure group                                                       | Comparison group                                                         | Primary model                                                                                        | At-risk date                                                         | Covariates                                                                                                             | Sensitivity analyses                                                                                                                         |
|------------------------------------|----------------------------------------------------------------------|--------------------------------------------------------------------------|------------------------------------------------------------------------------------------------------|----------------------------------------------------------------------|------------------------------------------------------------------------------------------------------------------------|----------------------------------------------------------------------------------------------------------------------------------------------|
| People with incident gout          | People with gout who were hospitalised for gout flares               | People with gout who were not hospitalised for gout flares               | Cox proportional hazards                                                                             | From gout diagnosis                                                  | Age, sex, calendar year of diagnosis, CKD, hypertension, diabetes mellitus, IHD, heart failure, previous CVA, obesity, | 1. Adjustment for serum urate level at diagnosis                                                                                             |
| People with incident gout          | ULT initiated within 12 months of diagnosis                          | No ULT initiated within 12 months of diagnosis                           | Cox proportional hazards                                                                             | From ULT initiation (dummy date imputed for ULT non-initiators)      | uroolithiasis; smoking status, alcohol excess, diuretic therapy                                                        | 1. Adjustment for serum urate level at diagnosis<br>2. Propensity model with IPTW<br>3. Adjustment for time from diagnosis to ULT initiation |
| People with gout who initiated ULT | Colchicine prophylaxis prescribed for $\geq 3$ months                | Colchicine prophylaxis not prescribed for $\geq 3$ months                | Cox proportional hazards                                                                             | From ULT initiation                                                  |                                                                                                                        | 1. Exclusion of individuals prescribed NSAID or corticosteroid prophylaxis                                                                   |
| People with gout who initiated ULT | Urate $< 360$ micromol/L achieved within 12 months of ULT initiation | Urate $< 360$ micromol/L not achieved within 12 months of ULT initiation | Cox proportional hazards with multiple imputation of target attainment in those without urate levels | From target attainment (dummy date imputed for target non-attainers) |                                                                                                                        | 1. Complete case analysis (unimputed)<br>2. Propensity model with IPTW                                                                       |
| People with gout who initiated ULT | Urate $< 300$ micromol/L achieved within 12 months of ULT initiation | Urate $< 300$ micromol/L not achieved within 12 months of ULT initiation | Cox proportional hazards with multiple imputation of target attainment in those without urate levels | From target attainment (dummy date imputed for target non-attainers) |                                                                                                                        | 1. Complete case analysis (unimputed)<br>2. Propensity model with IPTW                                                                       |

ULT: urate-lowering therapy; CKD: chronic kidney disease; IHD: ischaemic heart disease; CVA: cerebrovascular accident; IPTW: inverse probability of treatment weighting; NSAID: non-steroidal anti-inflammatory drug.

**Supplementary Table S2. Factors associated with hospitalisations for flares in people with gout who had baseline serum urate data available (n=184,185).**

| Variables                                    | Without adjustment for baseline urate |               |         | With adjustment for baseline urate |               |         |
|----------------------------------------------|---------------------------------------|---------------|---------|------------------------------------|---------------|---------|
|                                              | Hazard ratio                          | 95% CI        | p-value | Hazard ratio                       | 95% CI        | p-value |
| Age at diagnosis (per 10-year increase)      | 1.11                                  | (1.07 - 1.15) | <0.001  | 1.15                               | (1.11 - 1.19) | <0.001  |
| Female sex                                   | 0.76                                  | (0.71 - 0.82) | <0.001  | 0.83                               | (0.77 - 0.89) | <0.001  |
| Year of gout diagnosis                       | 1.03                                  | (1.02 - 1.04) | <0.001  | 1.03                               | (1.02 - 1.04) | <0.001  |
| CKD stages 3-5                               | 1.67                                  | (1.53 - 1.81) | <0.001  | 1.43                               | (1.31 - 1.56) | <0.001  |
| Hypertension                                 | 0.99                                  | (0.91 - 1.08) | 0.86    | 1.00                               | (0.92 - 1.08) | 0.97    |
| Diabetes mellitus                            | 1.22                                  | (1.13 - 1.33) | <0.001  | 1.23                               | (1.14 - 1.34) | <0.001  |
| Ischaemic heart disease                      | 1.15                                  | (1.06 - 1.25) | <0.001  | 1.15                               | (1.06 - 1.25) | <0.001  |
| Heart failure                                | 2.05                                  | (1.87 - 2.26) | <0.001  | 1.89                               | (1.71 - 2.08) | <0.001  |
| Previous CVA                                 | 1.31                                  | (1.18 - 1.45) | <0.001  | 1.30                               | (1.17 - 1.44) | <0.001  |
| Urolithiasis                                 | 1.00                                  | (0.83 - 1.22) | 0.97    | 1.00                               | (0.83 - 1.22) | 0.97    |
| Obesity                                      | 1.13                                  | (1.05 - 1.21) | <0.001  | 1.08                               | (1.01 - 1.16) | 0.03    |
| Current/ex-smoker                            | 0.95                                  | (0.88 - 1.02) | 0.14    | 0.94                               | (0.88 - 1.01) | 0.11    |
| Alcohol excess                               | 1.74                                  | (1.54 - 1.96) | <0.001  | 1.68                               | (1.49 - 1.90) | <0.001  |
| Diuretic therapy                             | 1.30                                  | (1.20 - 1.42) | <0.001  | 1.12                               | (1.03 - 1.22) | 0.01    |
| Baseline serum urate level (>480 micromol/L) | -                                     | -             | -       | 1.90                               | (1.77 - 2.05) | <0.001  |

Multivariable Cox proportional hazard model outputs are shown, with (right-hand side) and without (left-hand side) adjustment for serum urate level at diagnosis. Serum urate was included as a binary variable (above/below 480 micromol/L) corresponding to the threshold specified in the EULAR gout management guideline. Outputs were adjusted for all other covariates shown, including calendar year of diagnosis. Robust standard errors were estimated to account for clustering of patients within practice/region. CKD: chronic kidney disease; CVA: cerebrovascular accident.

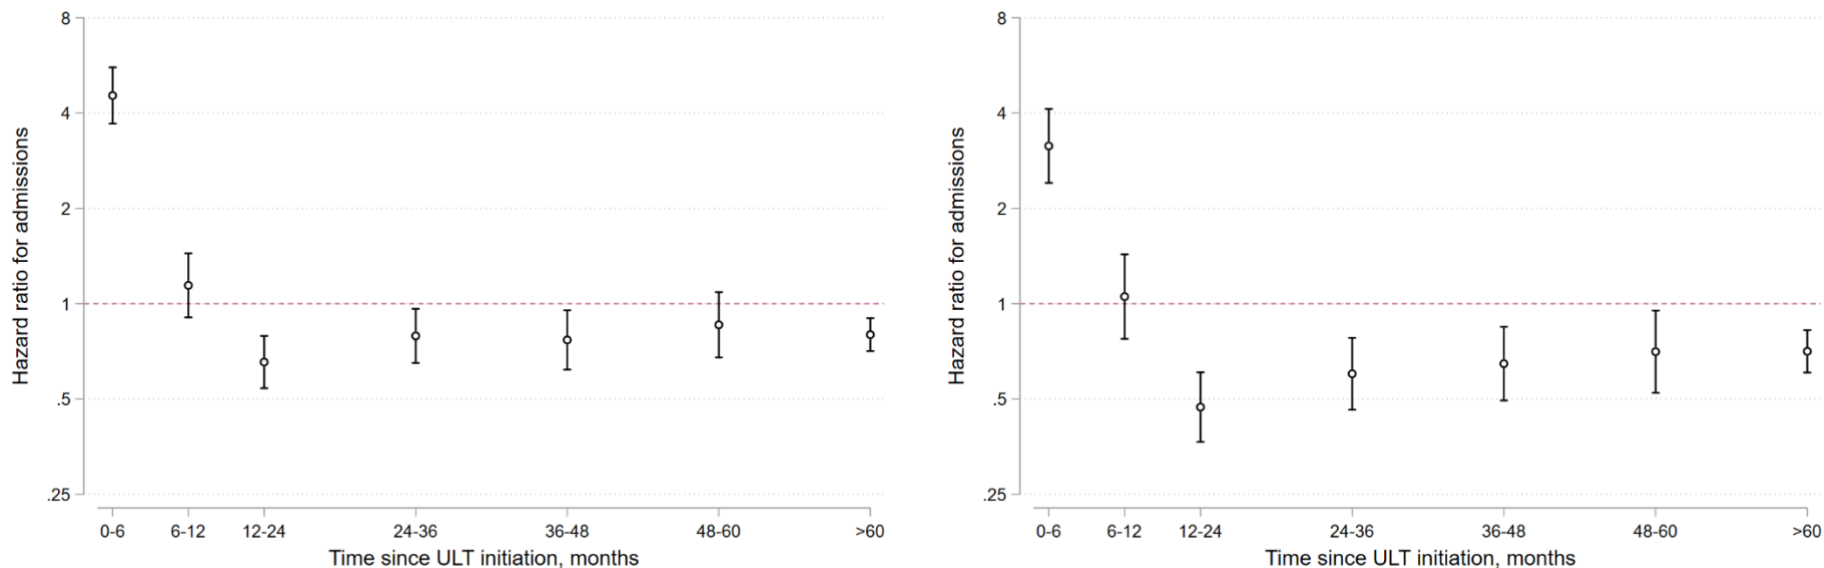

**Supplementary Figure S1. Hazard ratio of hospitalisations for flares in people with gout who initiated urate-lowering therapy (ULT) within 12 months of diagnosis, relative to those who did not initiate ULT.** Outputs are shown from Cox proportional hazard models: i) without adjustment for serum urate levels at diagnosis (left panel; primary model); and ii) with adjustment for serum urate levels at diagnosis (right panel; sensitivity analysis). In both models, the following covariates were adjusted for: age, sex, calendar year of gout diagnosis, diuretic use and comorbidities at diagnosis (hypertension, CKD, IHD, heart failure, diabetes mellitus, prior CVA, obesity, smoking status, alcohol excess, history of urolithiasis). A logarithmic y-axis was used, to reflect the exponential distribution of hazard functions.

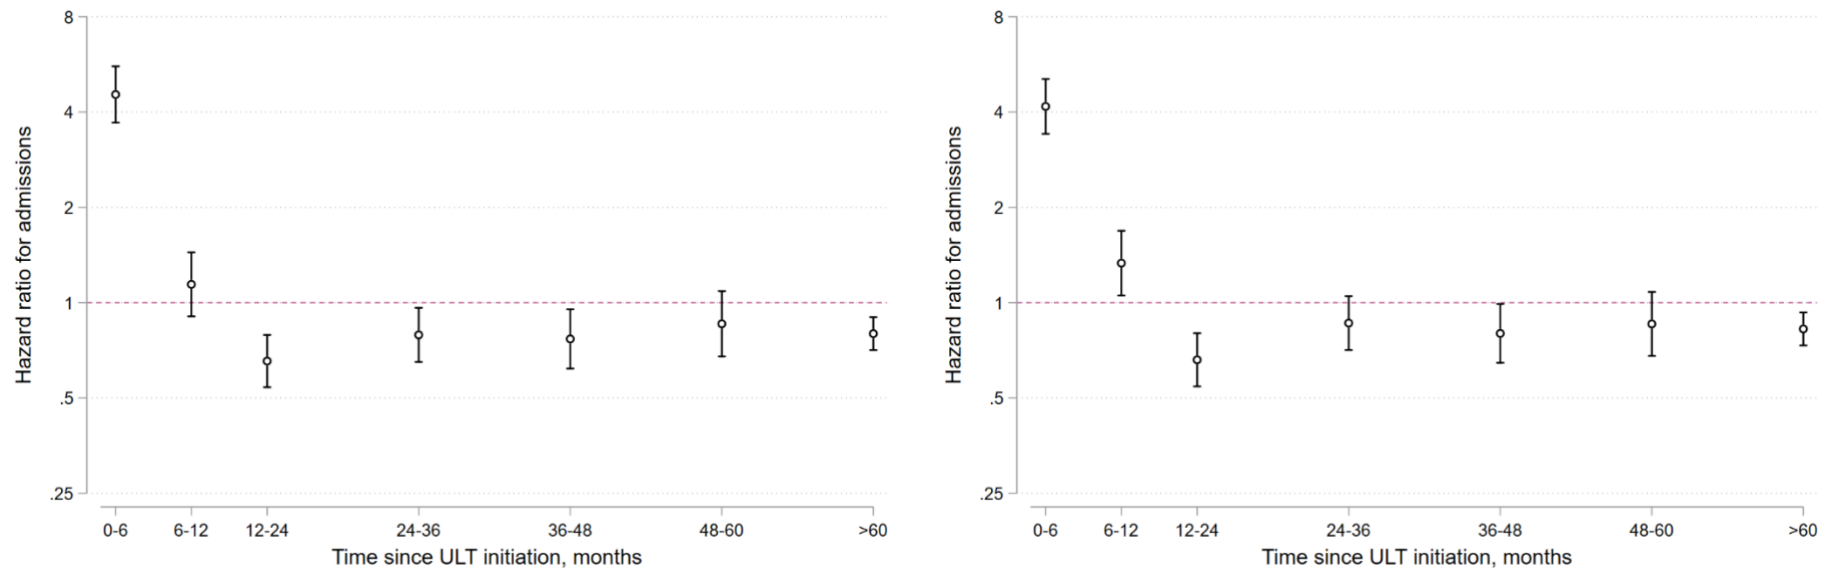

**Supplementary Figure S2. Hazard ratio of hospitalisations for flares in people with gout who initiated urate-lowering therapy (ULT) within 12 months of diagnosis, relative to those who did not initiate ULT.** Outputs from our primary Cox proportional hazard model (left panel) are compared to a propensity model with inverse probability treatment weighting (right panel). In both models, adjustment/weighting was performed for the following covariates: age, sex, calendar year of gout diagnosis, diuretic use and comorbidities at diagnosis (hypertension, CKD, IHD, heart failure, diabetes mellitus, prior CVA, obesity, smoking status, alcohol excess, history of urolithiasis). A logarithmic y-axis was used, to reflect the exponential distribution of hazard functions.

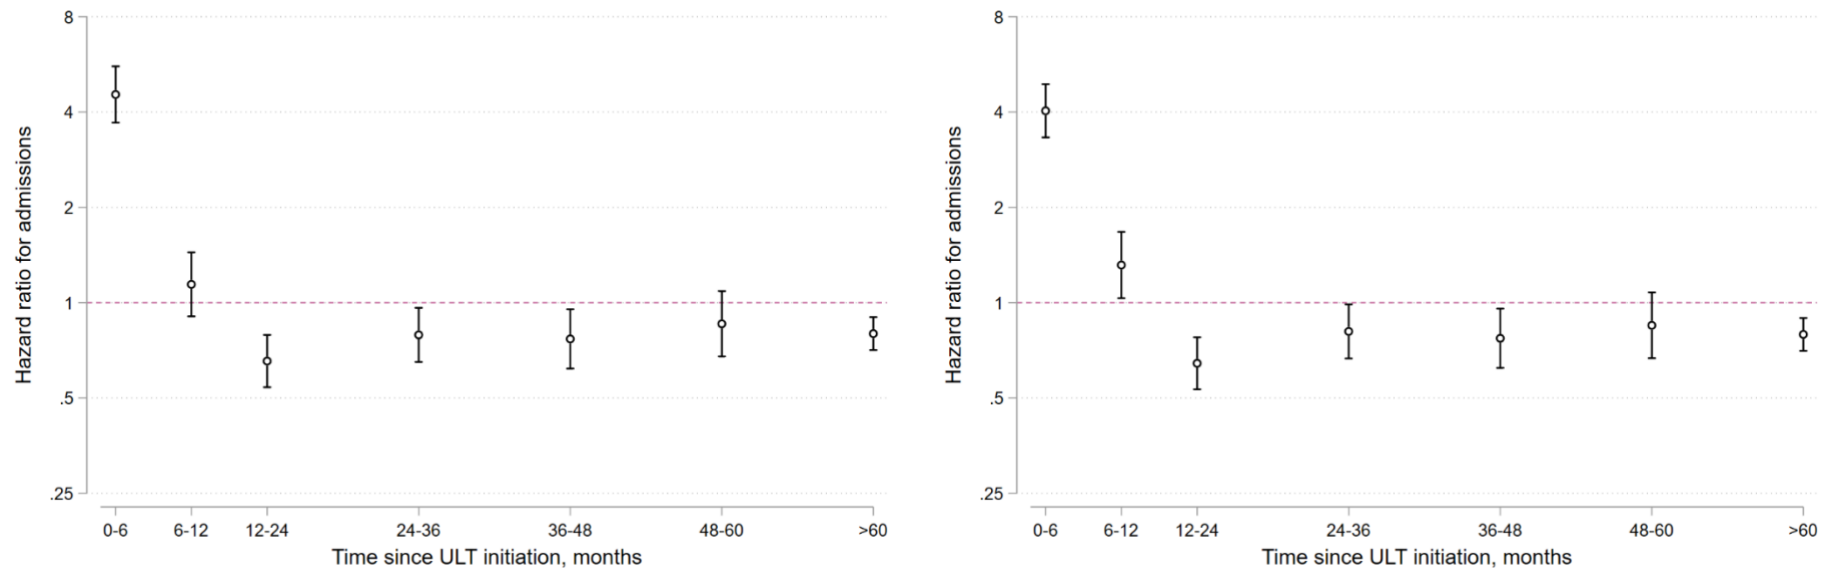

**Supplementary Figure S3. Hazard ratio of hospitalisations for flares in people with gout who initiated urate-lowering therapy (ULT) within 12 months of diagnosis, relative to those who did not initiate ULT.** Outputs from our primary Cox proportional hazard model (left panel) are compared to a sensitivity analysis that included adjustment for time from gout diagnosis to ULT initiation (right panel). A histogram of time from gout diagnosis to first prescription of ULT is shown in Supplementary Figure S4. In both models, adjustment/weighting was performed for the following covariates: age, sex, calendar year of gout diagnosis, diuretic use and comorbidities at diagnosis (hypertension, CKD, IHD, heart failure, diabetes mellitus, prior CVA, obesity, smoking status, alcohol excess, history of urolithiasis). A logarithmic y-axis was used, to reflect the exponential distribution of hazard functions.

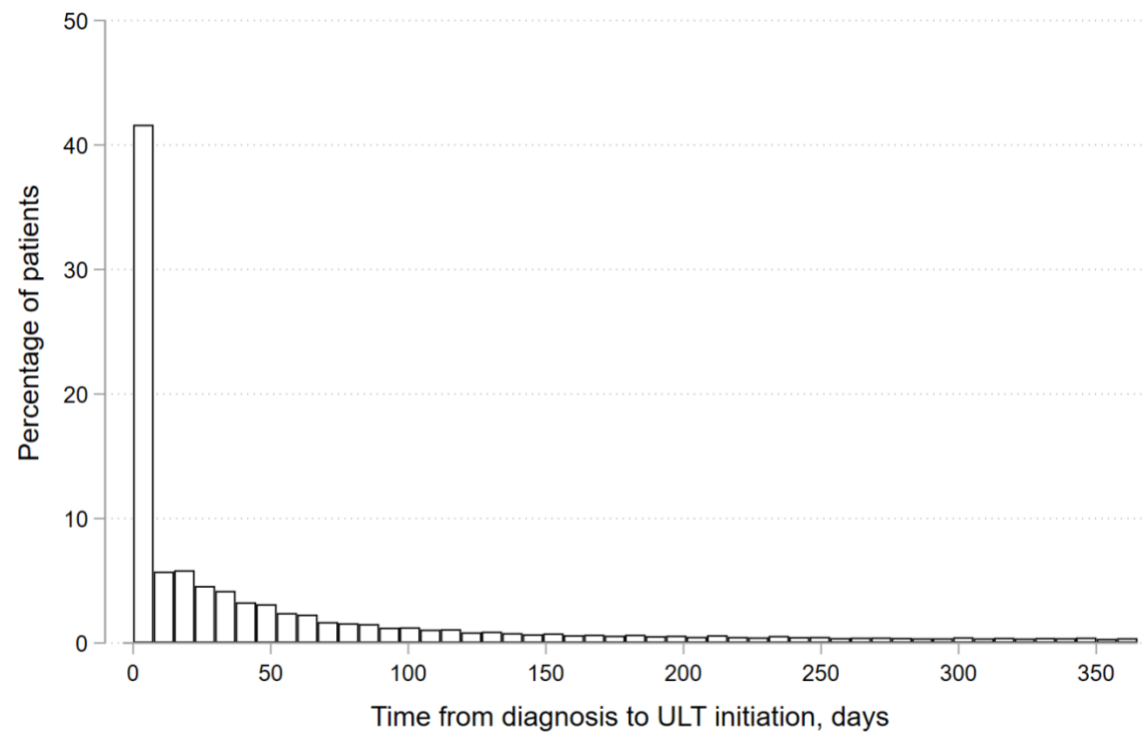

**Supplementary Figure S4.** Histogram of time from gout diagnosis to first prescription of ULT in patients who initiated ULT within 12 months of diagnosis. ULT: urate-lowering therapy.

### Supplementary Data S1. Gout diagnosis SNOMED codes

|                   |                                                                 |
|-------------------|-----------------------------------------------------------------|
| 924311000000106   | Acute exacerbation of gout                                      |
| 24595009          | Acute gouty arthritis                                           |
| 24595009          | Acute gouty arthropathy                                         |
| 48440001          | Arthritis due to gout                                           |
| 16068491000119107 | Arthritis of bilateral knees due to gout                        |
| 67148009          | Arthritis of great toe due to gout                              |
| 1074021000119103  | Arthritis of left foot due to gout                              |
| 1074031000119100  | Arthritis of left great toe due to gout                         |
| 1074001000119107  | Arthritis of right foot due to gout                             |
| 1074011000119105  | Arthritis of right great toe due to gout                        |
| 428839004         | Arthritis of toe due to gout                                    |
| 48440001          | Articular gout                                                  |
| 16040031000119108 | Bilateral chronic tophaceous gout of elbows                     |
| 16040071000119106 | Bilateral chronic tophaceous gout of hands                      |
| 16015911000119102 | Bilateral gouty arthritis of ankles                             |
| 16015951000119101 | Bilateral gouty arthritis of feet                               |
| 16010751000119107 | Bilateral gouty arthritis of great toes                         |
| 16068491000119107 | Bilateral gouty arthritis of knees                              |
| 16005991000119109 | Bilateral gouty tophus of elbows                                |
| 16076011000119100 | Bilateral gouty tophus of feet                                  |
| 16006631000119109 | Bilateral gouty tophus of hands                                 |
| 68451005          | Chronic arthritis due to gout                                   |
| 306141000119109   | Chronic gout of ankle and/or foot without tophus caused by drug |
| 306141000119109   | Chronic gout of ankle and/or foot without tophus due to drug    |
| 303891000119104   | Chronic gout of ankle without tophus due to renal impairment    |
| 306161000119108   | Chronic gout of elbow without tophus caused by drug             |
| 306161000119108   | Chronic gout of elbow without tophus due to drug                |
| 303911000119102   | Chronic gout of elbow without tophus due to renal impairment    |
| 306181000119104   | Chronic gout of hand without tophus caused by drug              |
| 306181000119104   | Chronic gout of hand without tophus due to drug                 |

|                 |                                                                       |
|-----------------|-----------------------------------------------------------------------|
| 303931000119107 | Chronic gout of hand without tophus due to renal impairment           |
| 306201000119103 | Chronic gout of hip without tophus caused by drug                     |
| 306201000119103 | Chronic gout of hip without tophus due to drug                        |
| 303951000119101 | Chronic gout of hip without tophus due to renal impairment            |
| 306221000119107 | Chronic gout of knee without tophus caused by drug                    |
| 306221000119107 | Chronic gout of knee without tophus due to drug                       |
| 303971000119105 | Chronic gout of knee without tophus due to renal impairment           |
| 306381000119102 | Chronic gout of multiple sites without tophus caused by drug          |
| 306381000119102 | Chronic gout of multiple sites without tophus due to drug             |
| 304131000119106 | Chronic gout of multiple sites without tophus due to renal impairment |
| 306541000119104 | Chronic gout of shoulder without tophus caused by drug                |
| 306541000119104 | Chronic gout of shoulder without tophus due to drug                   |
| 304291000119102 | Chronic gout of shoulder without tophus due to renal impairment       |
| 306561000119100 | Chronic gout of vertebra without tophus caused by drug                |
| 306561000119100 | Chronic gout of vertebra without tophus due to drug                   |
| 304311000119103 | Chronic gout of vertebra without tophus due to renal impairment       |
| 306601000119100 | Chronic gout of wrist without tophus caused by drug                   |
| 306601000119100 | Chronic gout of wrist without tophus due to drug                      |
| 304351000119102 | Chronic gout of wrist without tophus due to renal impairment          |
| 710733002       | Chronic gout without tophus                                           |
| 306581000119109 | Chronic gout without tophus caused by drug                            |
| 306581000119109 | Chronic gout without tophus due to drug                               |
| 304331000119108 | Chronic gout without tophus due to renal impairment                   |
| 68451005        | Chronic gouty arthritis                                               |
| 190829000       | Chronic gouty nephropathy                                             |
| 721285007       | Chronic primary gouty arthritis                                       |
| 73877009        | Chronic tophaceous gout                                               |
| 306571000119106 | Chronic tophaceous gout caused by drug                                |
| 306571000119106 | Chronic tophaceous gout due to drug                                   |
| 304321000119105 | Chronic tophaceous gout due to renal impairment                       |
| 306131000119100 | Chronic tophaceous gout of ankle and/or foot caused by drug           |



|                   |                                                                   |
|-------------------|-------------------------------------------------------------------|
| 306131000119100   | Chronic tophaceous gout of ankle and/or foot due to drug          |
| 303881000119102   | Chronic tophaceous gout of ankle due to renal impairment          |
| 16040031000119108 | Chronic tophaceous gout of bilateral elbows                       |
| 16040071000119106 | Chronic tophaceous gout of bilateral hands                        |
| 16040031000119108 | Chronic tophaceous gout of both elbows                            |
| 16040071000119106 | Chronic tophaceous gout of both hands                             |
| 306151000119106   | Chronic tophaceous gout of elbow caused by drug                   |
| 306151000119106   | Chronic tophaceous gout of elbow due to drug                      |
| 303901000119100   | Chronic tophaceous gout of elbow due to renal impairment          |
| 306171000119102   | Chronic tophaceous gout of hand caused by drug                    |
| 306171000119102   | Chronic tophaceous gout of hand due to drug                       |
| 303921000119109   | Chronic tophaceous gout of hand due to renal impairment           |
| 306191000119101   | Chronic tophaceous gout of hip caused by drug                     |
| 306191000119101   | Chronic tophaceous gout of hip due to drug                        |
| 303941000119103   | Chronic tophaceous gout of hip due to renal impairment            |
| 306211000119100   | Chronic tophaceous gout of knee caused by drug                    |
| 306211000119100   | Chronic tophaceous gout of knee due to drug                       |
| 303961000119104   | Chronic tophaceous gout of knee due to renal impairment           |
| 306371000119100   | Chronic tophaceous gout of multiple sites caused by drug          |
| 306371000119100   | Chronic tophaceous gout of multiple sites due to drug             |
| 304121000119108   | Chronic tophaceous gout of multiple sites due to renal impairment |
| 306531000119108   | Chronic tophaceous gout of shoulder caused by drug                |
| 306531000119108   | Chronic tophaceous gout of shoulder due to drug                   |
| 304281000119100   | Chronic tophaceous gout of shoulder due to renal impairment       |
| 306551000119102   | Chronic tophaceous gout of vertebra caused by drug                |
| 306551000119102   | Chronic tophaceous gout of vertebra due to drug                   |
| 304301000119101   | Chronic tophaceous gout of vertebra due to renal impairment       |
| 306591000119107   | Chronic tophaceous gout of wrist caused by drug                   |
| 306591000119107   | Chronic tophaceous gout of wrist due to drug                      |
| 304341000119104   | Chronic tophaceous gout of wrist due to renal impairment          |
| 170735000         | Date gout treatment started                                       |

|                 |                                                               |
|-----------------|---------------------------------------------------------------|
| 306141000119109 | Drug induced chronic gout of ankle and/or foot without tophus |
| 306161000119108 | Drug induced chronic gout of elbow without tophus             |
| 306181000119104 | Drug induced chronic gout of hand without tophus              |
| 306201000119103 | Drug induced chronic gout of hip without tophus               |
| 306221000119107 | Drug induced chronic gout of knee without tophus              |
| 306381000119102 | Drug induced chronic gout of multiple sites without tophus    |
| 306541000119104 | Drug induced chronic gout of shoulder without tophus          |
| 306561000119100 | Drug induced chronic gout of vertebra without tophus          |
| 306601000119100 | Drug induced chronic gout of wrist without tophus             |
| 306581000119109 | Drug induced chronic gout without tophus                      |
| 306571000119106 | Drug induced chronic tophaceous gout                          |
| 306131000119100 | Drug induced chronic tophaceous gout of ankle and/or foot     |
| 306151000119106 | Drug induced chronic tophaceous gout of elbow                 |
| 306171000119102 | Drug induced chronic tophaceous gout of hand                  |
| 306191000119101 | Drug induced chronic tophaceous gout of hip                   |
| 306211000119100 | Drug induced chronic tophaceous gout of knee                  |
| 306371000119100 | Drug induced chronic tophaceous gout of multiple sites        |
| 306531000119108 | Drug induced chronic tophaceous gout of shoulder              |
| 306551000119102 | Drug induced chronic tophaceous gout of vertebra              |
| 306591000119107 | Drug induced chronic tophaceous gout of wrist                 |
| 306611000119102 | Drug induced gout of ankle and/or foot                        |
| 306621000119109 | Drug induced gout of elbow                                    |
| 306631000119107 | Drug induced gout of hand                                     |
| 306641000119103 | Drug induced gout of hip                                      |
| 306651000119101 | Drug induced gout of knee                                     |
| 306731000119104 | Drug induced gout of multiple sites                           |
| 306811000119101 | Drug induced gout of shoulder                                 |
| 306821000119108 | Drug induced gout of vertebra                                 |
| 306831000119106 | Drug induced gout of wrist                                    |
| 239845005       | Drug-induced gout                                             |
| 330060000       | Drugs for the treatment of gout                               |

|                 |                                                |
|-----------------|------------------------------------------------|
| 46785007        | Familial gout with renal failure               |
| 46785007        | Familial juvenile gout                         |
| 90560007        | Gout                                           |
| 170737008       | Gout associated problem                        |
| 170737008       | Gout associated problem                        |
| 170737008       | Gout associated problems                       |
| 239845005       | Gout caused by drug                            |
| 239846006       | Gout caused by lead                            |
| 239844009       | Gout due to impairment of renal function       |
| 239846006       | Gout due to lead poisoning                     |
| 90560007        | Gout NOS                                       |
| 64665100000108  | Gout NOS                                       |
| 306611000119102 | Gout of ankle and/or foot caused by drug       |
| 306611000119102 | Gout of ankle and/or foot due to drug          |
| 306621000119109 | Gout of elbow caused by drug                   |
| 306621000119109 | Gout of elbow due to drug                      |
| 308791000119101 | Gout of elbow due to renal impairment          |
| 306631000119107 | Gout of hand caused by drug                    |
| 306631000119107 | Gout of hand due to drug                       |
| 308801000119100 | Gout of hand due to renal impairment           |
| 306641000119103 | Gout of hip caused by drug                     |
| 306641000119103 | Gout of hip due to drug                        |
| 308811000119102 | Gout of hip due to renal impairment            |
| 306651000119101 | Gout of knee caused by drug                    |
| 306651000119101 | Gout of knee due to drug                       |
| 308821000119109 | Gout of knee due to renal impairment           |
| 306731000119104 | Gout of multiple sites caused by drug          |
| 306731000119104 | Gout of multiple sites due to drug             |
| 308901000119105 | Gout of multiple sites due to renal impairment |
| 306811000119101 | Gout of shoulder caused by drug                |
| 306811000119101 | Gout of shoulder due to drug                   |

|                   |                                            |
|-------------------|--------------------------------------------|
| 298941000119101   | Gout of shoulder due to renal impairment   |
| 306821000119108   | Gout of vertebra caused by drug            |
| 306821000119108   | Gout of vertebra due to drug               |
| 298951000119104   | Gout of vertebra due to renal impairment   |
| 306831000119106   | Gout of wrist caused by drug               |
| 306831000119106   | Gout of wrist due to drug                  |
| 298961000119102   | Gout of wrist due to renal impairment      |
| 239845005         | Gout secondary to drug                     |
| 239847002         | Gout secondary to enzyme defect            |
| 239846006         | Gout secondary to lead                     |
| 239844009         | Gout secondary to renal impairment         |
| 646651000000108   | Gout Uncomplicated                         |
| 48440001          | Gouty arthritis                            |
| 48440001          | Gouty arthritis NOS                        |
| 16015911000119102 | Gouty arthritis of bilateral ankles        |
| 16015951000119101 | Gouty arthritis of bilateral feet          |
| 16010751000119107 | Gouty arthritis of bilateral great toes    |
| 16068491000119107 | Gouty arthritis of bilateral knees         |
| 16015911000119102 | Gouty arthritis of both ankles             |
| 16015951000119101 | Gouty arthritis of both feet               |
| 16010751000119107 | Gouty arthritis of both great toes         |
| 16068491000119107 | Gouty arthritis of both knees              |
| 67148009          | Gouty arthritis of great toe               |
| 1074021000119103  | Gouty arthritis of left foot               |
| 1074031000119100  | Gouty arthritis of left great toe          |
| 201670006         | Gouty arthritis of multiple sites          |
| 48440001          | Gouty arthritis of other specified site    |
| 1074001000119107  | Gouty arthritis of right foot              |
| 1074011000119105  | Gouty arthritis of right great toe         |
| 699681002         | Gouty arthritis of temporomandibular joint |
| 201669005         | Gouty arthritis of the ankle and foot      |

|                   |                                                |
|-------------------|------------------------------------------------|
| 201669005         | Gouty arthritis of the ankle and/or foot       |
| 48440001          | Gouty arthritis of the forearm                 |
| 201666003         | Gouty arthritis of the hand                    |
| 48440001          | Gouty arthritis of the lower leg               |
| 201667007         | Gouty arthritis of the pelvic region and thigh |
| 201663006         | Gouty arthritis of the shoulder region         |
| 201663006         | Gouty arthritis of the upper arm               |
| 428839004         | Gouty arthritis of toe                         |
| 190828008         | Gouty arthropathy                              |
| 239848007         | Gouty bursitis                                 |
| 1073971000119100  | Gouty bursitis of left olecranon               |
| 1073961000119106  | Gouty bursitis of right olecranon              |
| 43193009          | Gouty iritis                                   |
| 190829000         | Gouty nephropathy                              |
| 190829000         | Gouty nephropathy NOS                          |
| 190829000         | Gouty nephropathy unspecified                  |
| 9386003           | Gouty neuritis                                 |
| 2740001           | Gouty proteinuria                              |
| 850991000006106   | Gouty tophi + gout NOS                         |
| 190842000         | Gouty tophi of hand                            |
| 27277001          | Gouty tophi of heart                           |
| 27277001          | Gouty tophi of heart                           |
| 1033961000000104  | Gouty tophi of toe                             |
| 3875003           | Gouty tophus                                   |
| 402469004         | Gouty tophus                                   |
| 16005991000119109 | Gouty tophus of bilateral elbows               |
| 16076011000119100 | Gouty tophus of bilateral feet                 |
| 16006631000119109 | Gouty tophus of bilateral hands                |
| 16005991000119109 | Gouty tophus of both elbows                    |
| 16076011000119100 | Gouty tophus of both feet                      |
| 16006631000119109 | Gouty tophus of both hands                     |

|                   |                                                          |
|-------------------|----------------------------------------------------------|
| 281362006         | Gouty tophus of bursa                                    |
| 402470003         | Gouty tophus of digit                                    |
| 190842000         | Gouty tophus of hand                                     |
| 27277001          | Gouty tophus of heart                                    |
| 16076051000119104 | Gouty tophus of left elbow                               |
| 16076171000119109 | Gouty tophus of left foot                                |
| 16006591000119109 | Gouty tophus of left hand                                |
| 281364007         | Gouty tophus of olecranon bursa                          |
| 14763005          | Gouty tophus of pinna                                    |
| 281365008         | Gouty tophus of prepatellar bursa                        |
| 16076131000119106 | Gouty tophus of right elbow                              |
| 16075931000119103 | Gouty tophus of right foot                               |
| 16006551000119104 | Gouty tophus of right hand                               |
| 281363001         | Gouty tophus of tendon                                   |
| 719680009         | Gouty tophus of toe                                      |
| 24595009          | Idiopathic gout                                          |
| 170731009         | Initial gout assessment                                  |
| 283839008         | Intercritical gout                                       |
| 284680007         | Interval gout                                            |
| 170733007         | Joints gout affected                                     |
| 284680007         | Latent gout                                              |
| 239846006         | Lead gout                                                |
| 239846006         | Lead-induced gout                                        |
| 3875003           | Other specified gouty manifestation                      |
| 90560007          | Other specified gouty manifestation NOS                  |
| 46785007          | Precocious adolescent gout                               |
| 310101000119107   | Primary chronic gout without tophus                      |
| 309661000119108   | Primary chronic gout without tophus of ankle and/or foot |
| 309681000119104   | Primary chronic gout without tophus of elbow             |
| 309701000119101   | Primary chronic gout without tophus of hand              |
| 309721000119105   | Primary chronic gout without tophus of hip               |

|                   |                                                          |
|-------------------|----------------------------------------------------------|
| 309741000119104   | Primary chronic gout without tophus of knee              |
| 309901000119103   | Primary chronic gout without tophus of multiple sites    |
| 310061000119109   | Primary chronic gout without tophus of shoulder          |
| 310081000119100   | Primary chronic gout without tophus of vertebra          |
| 310121000119103   | Primary chronic gout without tophus of wrist             |
| 24595009          | Primary gout                                             |
| 69896004          | Rheumatic gout                                           |
| 239846006         | Saturnine gout                                           |
| 710734008         | Secondary chronic gout without tophus                    |
| 239843003         | Secondary gout                                           |
| 402469004         | Tophus co-occurrent and due to gout                      |
| 16005991000119109 | Tophus of bilateral elbows co-occurrent and due to gout  |
| 16076011000119100 | Tophus of bilateral feet co-occurrent and due to gout    |
| 16006631000119109 | Tophus of bilateral hands co-occurrent and due to gout   |
| 281362006         | Tophus of bursa co-occurrent and due to gout             |
| 402470003         | Tophus of digit co-occurrent and due to gout             |
| 14763005          | Tophus of ear co-occurrent and due to gout               |
| 190842000         | Tophus of hand co-occurrent and due to gout              |
| 27277001          | Tophus of heart co-occurrent and due to gout             |
| 16076051000119104 | Tophus of left elbow co-occurrent and due to gout        |
| 16076171000119109 | Tophus of left foot co-occurrent and due to gout         |
| 16006591000119109 | Tophus of left hand co-occurrent and due to gout         |
| 281364007         | Tophus of olecranon bursa co-occurrent and due to gout   |
| 281365008         | Tophus of prepatellar bursa co-occurrent and due to gout |
| 16076131000119106 | Tophus of right elbow co-occurrent and due to gout       |
| 16075931000119103 | Tophus of right foot co-occurrent and due to gout        |
| 16006551000119104 | Tophus of right hand co-occurrent and due to gout        |
| 281363001         | Tophus of tendon co-occurrent and due to gout            |
| 719680009         | Tophus of toe co-occurrent and due to gout               |
| 3875003           | Urate tophus                                             |
| 28428009          | Visceral gout                                            |

## **Supplementary Data S2. Comorbidity definitions**

### ***Chronic kidney disease (CKD)***

Definition - ever or current diagnostic code (see below) for CKD stages 3 to 5, renal failure, dialysis or a renal transplant at the time of index gout diagnosis, and/or two consecutive estimated glomerular filtration rates  $<60$  ml/min/1.73 m<sup>2</sup> closest to the gout index diagnosis date (assuming they were within 5 years of diagnosis).

### ***Hypertension***

Definition - ever or current diagnostic code for hypertension at the time of index gout diagnosis. Absence of the comorbidity was assumed if a diagnostic code was not present.

### ***Diabetes mellitus***

Definition - ever or current diagnostic code for diabetes mellitus at the time of index gout diagnosis. Absence of the comorbidity was assumed if a diagnostic code was not present.

### ***Ischaemic heart disease***

Definition - ever or current diagnostic code for ischaemic heart disease at the time of index gout diagnosis. Absence of the comorbidity was assumed if a diagnostic code was not present.

### ***Stroke or transient ischaemic attack***

Definition - ever or current diagnostic code for a stroke or transient ischaemic attack at the time of index gout diagnosis. Absence of the comorbidity was assumed if a diagnostic code was not present.

### ***Heart failure***

Definition - ever or current diagnostic code for heart failure at the time of index gout diagnosis. Absence of the comorbidity was assumed if a diagnostic code was not present.

### ***Obesity***

Definition – recorded body mass index  $\geq 30$  kg/m<sup>2</sup> on the reading closest to the index gout diagnosis date (assuming this reading was within 5 years before or after the diagnosis date).

### ***Urolithiasis***

Definition - ever or current diagnostic code for urolithiasis at the time of index gout diagnosis. Urolithiasis was assumed not present in the absence of a diagnostic code.

### ***Alcohol excess***

Definition - ever or current diagnostic code for alcohol excess or an alcohol-related problem at the time of index gout diagnosis. Absence of the comorbidity was assumed if a diagnostic code was not present.

### ***Smoking status***



Definition - ever or current diagnostic code for being an ex-smoker or current smoker at the time of index gout diagnosis.

***Diuretic therapy***

Definition - prescription issued for a diuretic medication (furosemide, bendroflumethiazide, spironolactone, bumetanide, indapamide, hydrochlorothiazide, eplerenone, metolazone, amiloride, torasemide, chlortalidone, benzthiazide or xipamide) within 4 months of the index gout diagnosis date.
